# Supplementary material for: Highly twisted bipolar molecules for efficient near-ultraviolet organic light-emitting diodesviaa hybridized local and charge-transfer mechanism
Source: Royal Society of Chemistry journal article supplement (doi:10.1039/d2tc04421h), 2022-12-29
Supplement: d2tc04421h1.pdf [file d2tc04421h1.pdf]

# Highly Twisted Bipolar Molecules for Efficient Near-Ultraviolet Organic Light-Emitting Diodes via Hybridized Local and Charge-Transfer Mechanism

Ziting Zhong,<sup>a,†</sup> Zhangshan Liu,<sup>b,†</sup> Sinuo Geng,<sup>a</sup> Huihui Li,<sup>a</sup> Xin Jiang Feng,<sup>\*,a</sup> Zujin Zhao,<sup>\*,b</sup> and Hua Lu<sup>\*,a</sup>

## I. Supplementary Figures and Tables.

|                                                                                                                     |    |
|---------------------------------------------------------------------------------------------------------------------|----|
| 1. Fig. S1 TGA and DSC traces.....                                                                                  | S2 |
| 2. Fig. S2 Absorption spectra of C2MPI, C2PPI in different solvents.....                                            | S2 |
| 3. Fig. S3 Emission spectra of C2MPI, C2PPI in different solvents.....                                              | S2 |
| 4. Table S1 Photophysical properties of C2MPI, C2PPI in different solvents.....                                     | S3 |
| 5. Fig. S4 Emission spectra and pictures of powders @365 nm UV lamp (inset) in film and in powder.....              | S3 |
| 6. Table S2 Emission band maxima and the absolute quantum yields in the solid-state.....                            | S3 |
| 7. Fig. S5 Configurations and the twisting angles of C2MPI and C2PPI by theoretical calculation.....                | S4 |
| 8. Fig. S6 Natural transition orbitals of S <sub>0</sub> to S <sub>n</sub> /T <sub>n</sub> for C2MPI and C2PPI..... | S4 |
| 9. Table S3 TD-DFT calculation using the B3LYP functional with 6-31G(d,p) basis sets.....                           | S5 |
| 10. Fig. S7 Doped device configuration, molecules used and their energy levels.....                                 | S6 |
| 11. Fig. S8 Luminance-voltage-current density characteristics for devices B1–B8.....                                | S7 |
| 12. Fig. S9 External quantum efficiencies-luminance characteristics for devices B1–B8.....                          | S7 |
| 13. Fig. S10 EL spectra for devices B1–B8.....                                                                      | S7 |

## II. General details and measurements specifications.....S8

## III. <sup>1</sup>H NMR of C2MPI, C2PPI in CDCl<sub>3</sub> or CD<sub>2</sub>Cl<sub>2</sub>.....S10

## IV. <sup>13</sup>C NMR of C2MPI, C2PPI in CDCl<sub>3</sub> or CD<sub>2</sub>Cl<sub>2</sub>.....S14

## V. HR-MS of C2MPI, C2PPI.....S17

## I. Supplementary Figures and Tables.

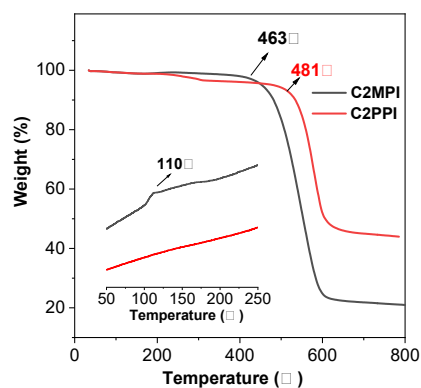

Fig. S1. Thermogravimetric analysis traces differential scanning calorimetry traces (inset) for **C2MPI** and **C2PPI**.

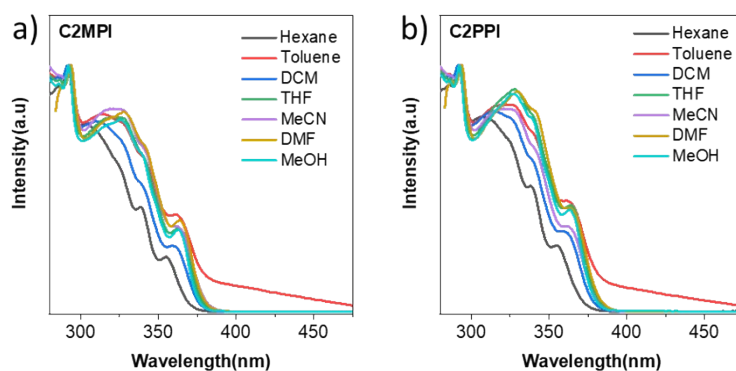

Fig. S2. Absorption spectra of **C2MPI** a) and **C2PPI** b) in different solvents.

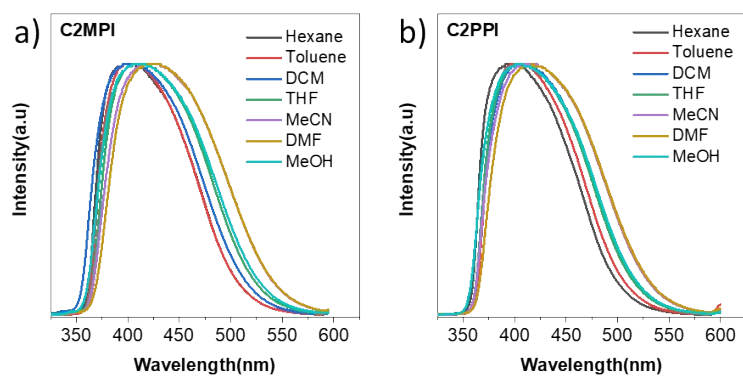

Fig. S3 Emission spectra of **C2MPI** a), **C2PPI** b) in different solvents.

**Table S1.** Photo physical properties of **C2MPI** and **C2PPI** in different solvents.

|              | Solvent | $\lambda_{\text{abs}}^a$ (nm) | $\lambda_{\text{em}}^a$ (nm) | $\Delta\nu_{\text{em-abs}}^b$ (cm <sup>-1</sup> ) | $\Phi_F^c$ | $\tau_F$ [ns] <sup>d</sup> |
|--------------|---------|-------------------------------|------------------------------|---------------------------------------------------|------------|----------------------------|
| <b>C2MPI</b> | Hexane  | 363                           | 398                          | 2423                                              | 0.80       | 1.63                       |
|              | Toluene | 364                           | 402                          | 2597                                              | 0.86       | 0.00                       |
|              | DCM     | 363                           | 409                          | 3098                                              | 0.86       | 2.08                       |
|              | THF     | 363                           | 407                          | 2978                                              | 0.94       | 1.39                       |
|              | MeCN    | 360                           | 413                          | 3565                                              | 0.99       | 1.65                       |
|              | DMF     | 362                           | 417                          | 3643                                              | 1.00       | 1.53                       |
|              | MeOH    | 355                           | 406                          | 3538                                              | 0.99       | 1.51                       |
| <b>C2PPI</b> | Hexane  | 363                           | 404                          | 2796                                              | 0.83       | 1.21                       |
|              | Toluene | 364                           | 410                          | 3082                                              | 0.90       | 0.00                       |
|              | DCM     | 362                           | 415                          | 3528                                              | 0.94       | 1.34                       |
|              | THF     | 364                           | 411                          | 3142                                              | 1.00       | 1.38                       |
|              | MeCN    | 359                           | 421                          | 4102                                              | 1.00       | 1.48                       |
|              | DMF     | 362                           | 425                          | 4095                                              | 1.00       | 1.56                       |
|              | MeOH    | 355                           | 411                          | 3838                                              | 0.59       | 1.40                       |

<sup>a)</sup> Absorption and emission maxima. <sup>b)</sup> Stokes-shift value. <sup>c)</sup> Fluorescence quantum yield. <sup>d)</sup> Fluorescence lifetime detected at the maximum fluorescence wavelengths.

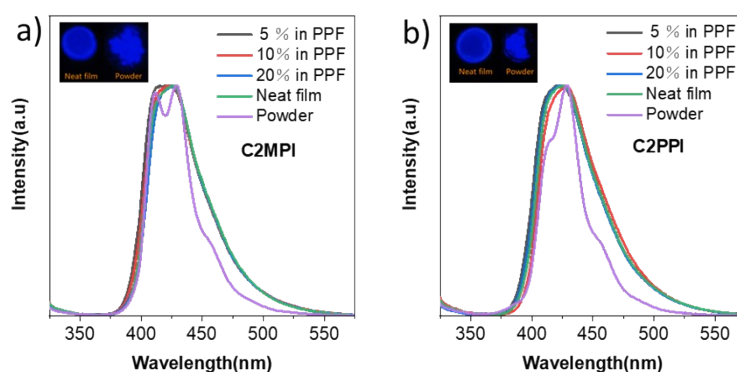

**Fig. S4.** Emission spectra and pictures of powders @365 nm UV lamp (inset) of **C2MPI** a) and **C2PPI** b) in film and in powder.

**Table S2.** Emission band maxima and the absolute quantum yields of **C2MPI** and **C2PPI** in the PPF film and in the powder form.

| $E_m/\Phi_F$ | Film      |            |            |          | Powder   |
|--------------|-----------|------------|------------|----------|----------|
|              | 5% in PPF | 10% in PPF | 20% in PPF | Neat     |          |
| <b>C2MPI</b> | 422/0.94  | 424/0.91   | 425/0.99   | 427/0.88 | 429/0.90 |
| <b>C2PPI</b> | 420/1.00  | 428/1.00   | 425/0.99   | 426/0.91 | 428/0.62 |

PPF = 2,8-bis(diphenylphosphoryl)dibenzo[b,d]furan

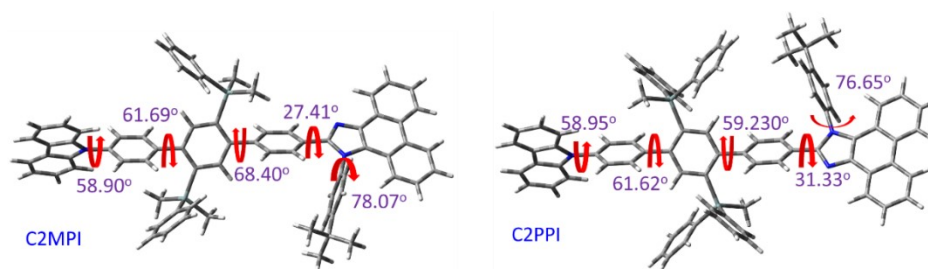

Fig. S5. Configurations and the twisting angles of C2MPI and C2PPI derived from theoretical calculation.

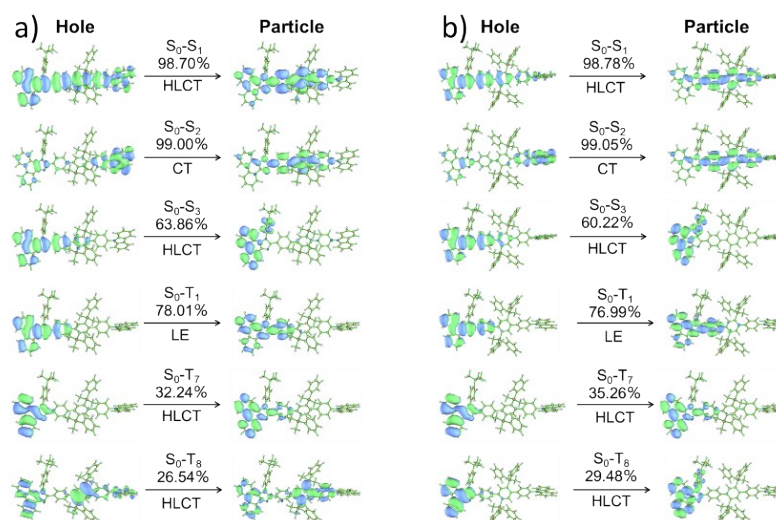

Fig. S6. Natural transition orbitals of  $S_0$  to  $S_n/T_n$  for a) C2MPI and b) C2PPI.

**Table S3.** Calculated excited wavelength ( $\lambda$ ), oscillator strengths ( $f$ ) and the related wave functions calculated by using the B3LYP functional with 6-31G(d,p) basis sets.

|              | State <sup>a</sup> | E (eV) <sup>b</sup> | $\lambda$ (nm) <sup>c</sup> | $f$ <sup>d</sup> | Orbital (coefficient) <sup>e</sup>                     |
|--------------|--------------------|---------------------|-----------------------------|------------------|--------------------------------------------------------|
| <b>C2MPI</b> | S1                 | 3.73                | 333                         | 0.9574           | H-1→L (36%), H→L (54%)                                 |
|              | S2                 | 3.86                | 322                         | 0.0311           | H-1→L (44%), H→L (31%), H→L+1 (13%)                    |
|              | S3                 | 3.90                | 318                         | 0.0260           | H-1→L (11%), H-1→L+1 (10%), H-1→L+2 (37%), H→L+2 (25%) |
|              | S4                 | 4.06                | 306                         | 0.0541           | H-1→L+3 (43%), H→L+1 (13%), H→L+3 (24%)                |
|              | S5                 | 4.10                | 303                         | 0.0568           | H-1→L+4 (30%), H→L+4 (61%)                             |
|              | S6                 | 4.11                | 302                         | 0.0536           | H-1→L+1 (18%), H→L (13%), H→L+1 (41%)                  |
|              | S7                 | 4.16                | 299                         | 0.0439           | H-3→L (14%), H-1→L+5 (37%), H→L+5 (25%)                |
|              | S9                 | 4.27                | 291                         | 0.0205           | H-1→L+6 (15%), H→L+5 (13%), H→L+6 (44%)                |
|              | <b>C2PPI</b>       | S1                  | 3.67                        | 339              | 0.9317                                                 |
| S2           |                    | 3.82                | 325                         | 0.0301           | H-1→L (85%)                                            |
| S5           |                    | 4.10                | 303                         | 0.0570           | H-1→L+3 (83%)                                          |
| S7           |                    | 4.19                | 297                         | 0.0441           | H-3→L (18%), H→L+6 (49%)                               |
| S8           |                    | 4.20                | 296                         | 0.0930           | H-1→L+1 (67%)                                          |
| S9           |                    | 4.23                | 293                         | 0.0361           | H-1→L+4 (53%), H-1→L+5 (11%), H→L+4 (11%)              |

<sup>a</sup>) Excited state. <sup>b</sup>) Calculated energy gaps. <sup>c</sup>) Experimental absorption wavelengths <sup>d</sup>) Oscillator strength (values < 0.02 are not included). <sup>e</sup>) MOs involved in the transitions, H = HOMO, L = LUMO.

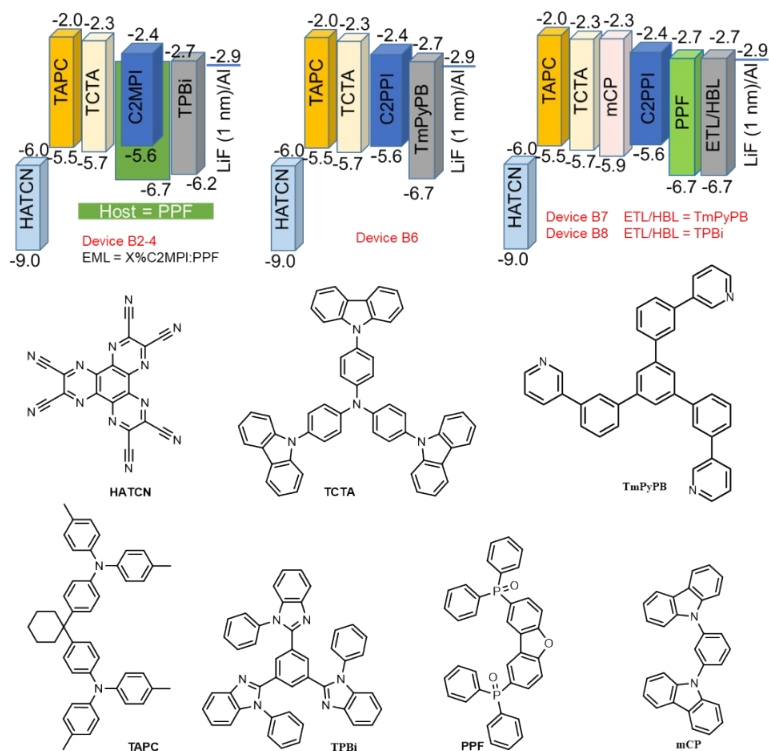

Fig. 7. Device configurations of B2-4 and B6-8, molecules used and their energy levels.

Device configurations and the functional materials used are as follows:

**B1:** ITO/HATCN (5 nm)/TAPC (60 nm)/TcTa (5 nm)/C2MPI (20 nm) /TPBi (40 nm)/LiF (1 nm)/Al

**B2:** ITO/HATCN (5 nm)/TAPC (60 nm)/TcTa (5 nm)/5 wt% C2MPI (20 nm): PPF / TPBi (40 nm)/LiF (1 nm)/Al

**B3:** ITO/HATCN (5 nm)/TAPC (60 nm)/TcTa (5 nm)/10 wt% C2MPI (20 nm): PPF / TPBi (40 nm)/LiF (1 nm)/Al

**B4:** ITO/HATCN (5 nm)/TAPC (60 nm)/TcTa (5 nm)/20 wt% C2MPI (20 nm): PPF / TPBi (40 nm)/LiF (1 nm)/Al

**B5:** ITO/HATCN (5 nm)/TAPC (50 nm)/TcTa (5 nm)/C2PPI (20 nm) /TPBi (40 nm)/LiF (1 nm)/Al

**B6:** ITO/HATCN (5 nm)/TAPC (50 nm)/TcTa (5 nm)/C2PPI (20 nm) /TmPyPB (40 nm)/LiF (1 nm)/Al

**B7:** ITO/HATCN (5 nm)/TAPC (50 nm)/TcTa (5 nm)/mCP (5 nm)/C2PPI (20 nm) /PPF (5 nm)/TmPyPB (40 nm)/LiF (1 nm)/Al

**B8:** ITO/HATCN (5 nm)/TAPC (50 nm)/TcTa (5 nm)/mCP (5 nm)/C2PPI (20 nm) /PPF (5 nm)/TPBi (40 nm)/LiF (1 nm)/Al

ITO: transparent anode; HATCN: hole-injecting layer (HIL); TAPC: hole-transporting layer (HTL); TcTa: electron- and exciton-blocking layer; mCP: works as a buffer layer between hole-transporting layer and light-emitting layer, PPF: exciton blocking layer; TmPyPB/TPBi: electron-transporting layer (ETL) and hole-blocking layer (HBL); LiF and Al: electron-injecting layer (EIL) and cathode.

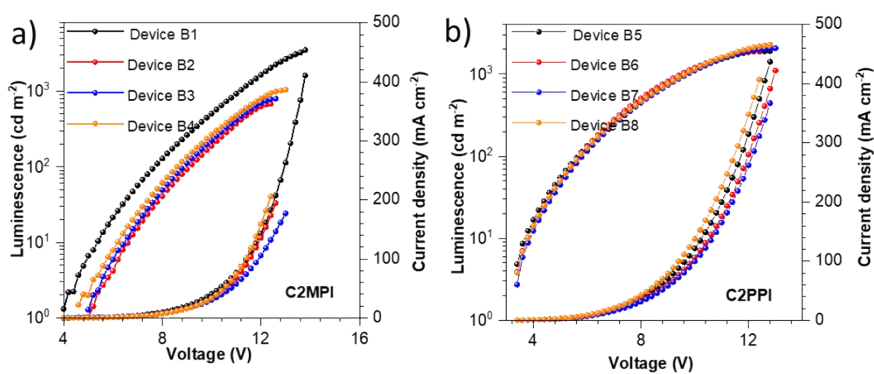

Fig. S8. Luminance-voltage-current density characteristics for devices using **C2MPI** a), **C2PPI** b) as emitters.

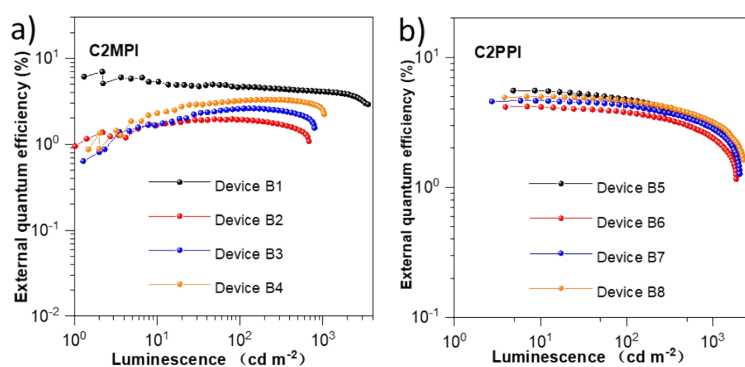

Fig. S9. External quantum efficiencies-luminance characteristics for devices using **C2MPI** a), **C2PPI** b) as emitters.

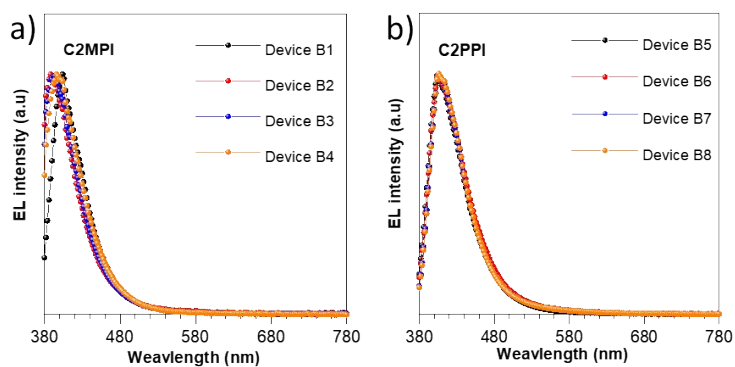

Fig. S10. EL spectra for devices using **C2MPI** a), **C2PPI** b) as emitters.

## II. General details and measurement specifications

### *General details*

All reagents and solvents were used as purchased from commercial sources. Toluene and tetrahydrofuran were anhydrous.  $^1\text{H}$  NMR and  $^{13}\text{C}$  NMR spectra, mass spectrometric measurements, thermogravimetric analysis, differential scanning calorimetry (DSC) analysis, UV-Vis spectra, and fluorescence spectra in solution were measured using a Bruker AM 400/500 spectrometer, MicroQII mass spectrometer, TGA instrument (PE-TGA6), TA Instruments DSC 2920, Shimadzu UV-1800 spectrophotometer and Horiba JobinYvon Fluorolog-3 spectrofluorimeter, respectively. The fluorescence quantum yields of the films were measured by the integrating sphere using Hamamatsu C13534 spectrometer. Cyclic voltammetric (CV) measurements were performed using a computer-controlled on a computer-controlled CHI650E.

### *Spectroscopic measurements*

Absorption and emission measurements were carried out in  $1 \times 1$  cm quartz cuvettes. Films were prepared by evaporation of the 2,8-bis(diphenylphosphoryl)dibenzo[b,d]furan (PPF) containing 5 wt%, 10 wt% and 20 wt% dyes in dichloromethane onto a Teflon vessel, which was utilized to measure the electronic spectra. These films were stable and no change in absorption and emission was observed over an extended period of time.

The redox potentials were measured on a Zahner Electrochemical Workstation at room temperature with a platinum working electrode, a platinum wire counter electrode, and an  $\text{Ag}/\text{Ag}^+$  reference electrode using  $\text{Fc}^+/\text{Fc}$  as an external standard and 0.1 M  $n\text{-Bu}_4\text{NPF}_6$  solution in DCM as a supporting electrolyte.

### *Device fabrication*

Glass substrates pre-coated with a 90 nm-thin layer of indium tin oxide (ITO) with a sheet resistance of 15–20  $\Omega$  per square were completely cleaned in ultrasonic bath of detergent and deionized water, respectively, each step takes 30 minutes. After that, the substrates were dried in a 65  $^\circ\text{C}$  oven. Then, the substrates were treated by  $\text{O}_2$  plasma for 10 minutes to improve the hole injection capacity of ITO. The vacuum-deposited OLEDs were constructed under a pressure of  $< 5 \times 10^{-4}$  Pa. Organic materials, LiF and Al were deposited with the rates of 1–2  $\text{\AA s}^{-1}$ , 0.1  $\text{\AA s}^{-1}$  and 10  $\text{\AA s}^{-1}$ , respectively. All the device characterizations were carried out at room temperature under ambient laboratory



conditions without any additional encapsulation, as soon as the devices were fabricated. EL spectra were obtained in normal direction via a spectrometer (Ocean Optics USB 2000+). Current density-voltage-luminance and external quantum efficiency were characterized with a dual-channel Keithley 2614B source meter and a PIN-25D silicon photodiode.

#### *DFT calculations*

The G16W software package was used to carry out a DFT geometry optimization using the B3LYP functional with 6-31G(d,p) basis sets. UV-visible spectra were calculated by the B3LYP functional with 6-31G(d,p) basis sets.

III.  $^1\text{H}$  NMR of C2MPI and C2PPI in  $\text{CDCl}_3$  or  $\text{CD}_2\text{Cl}_2$ .

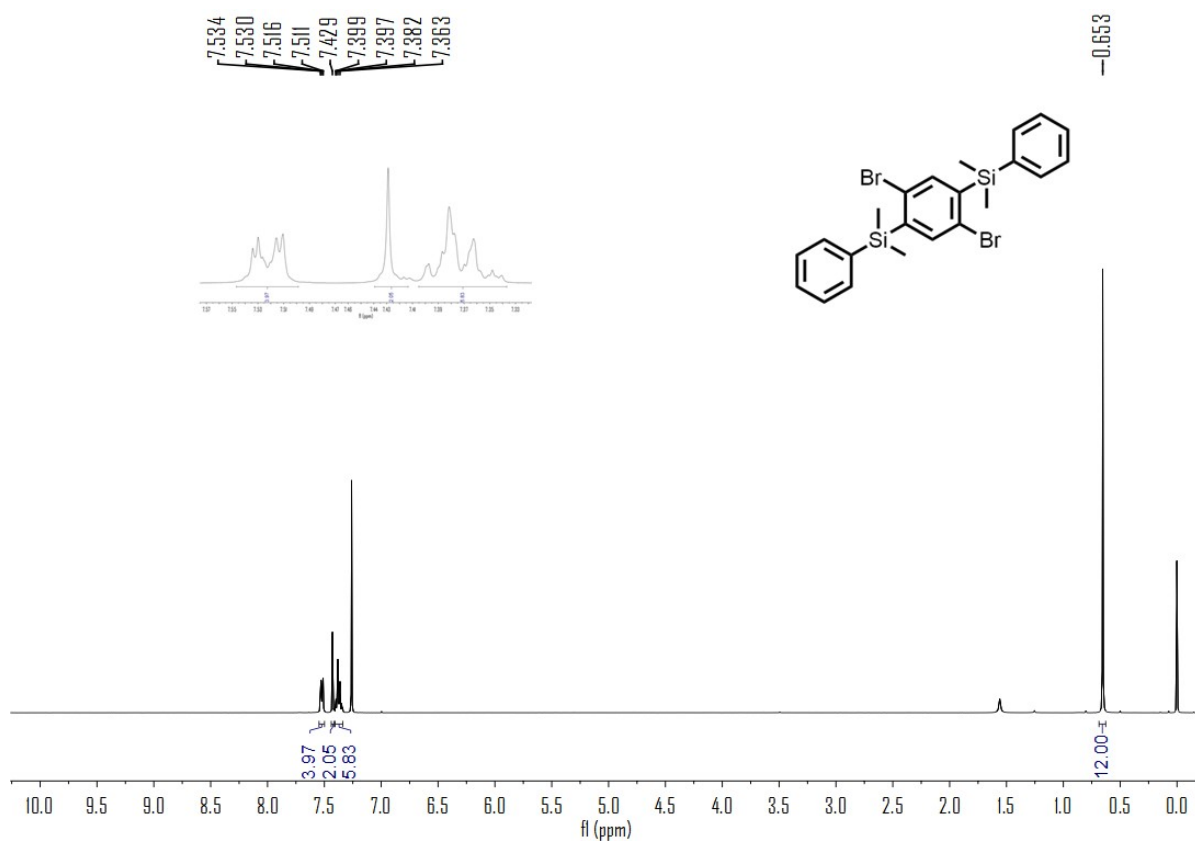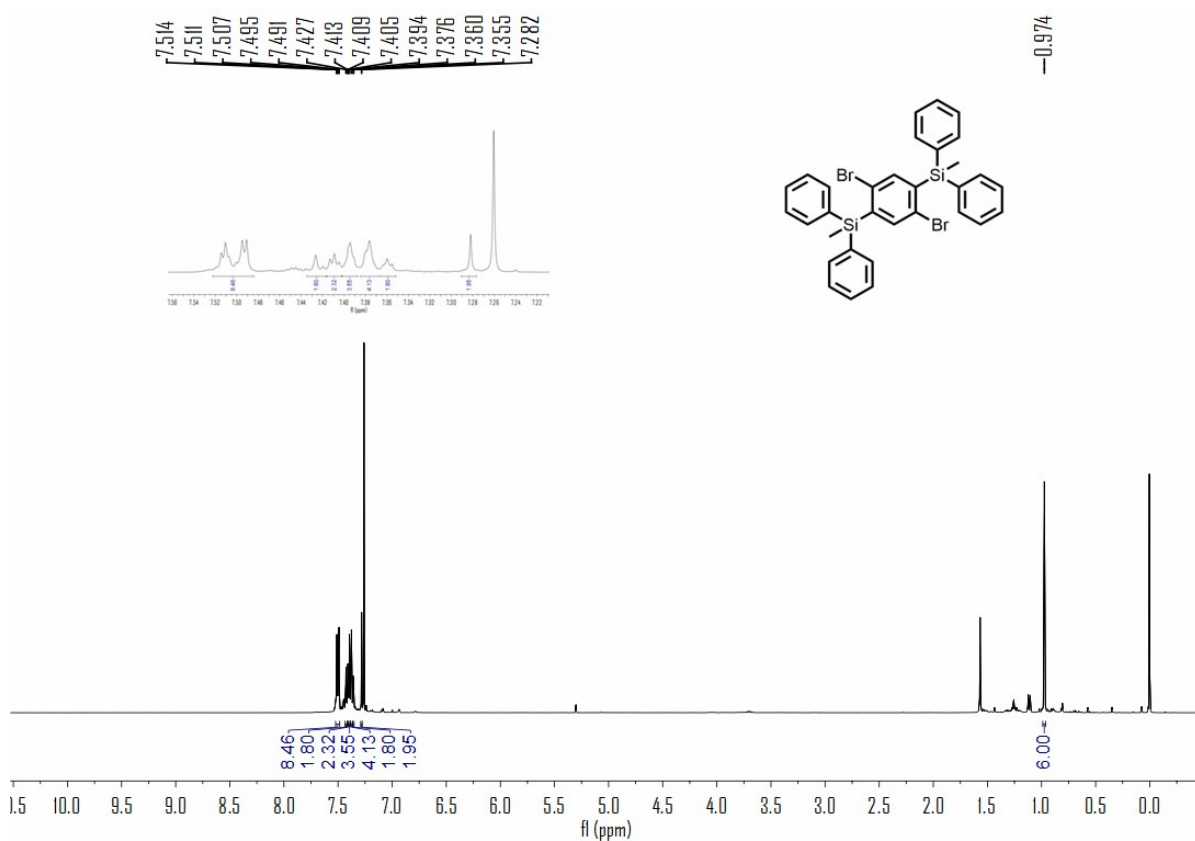

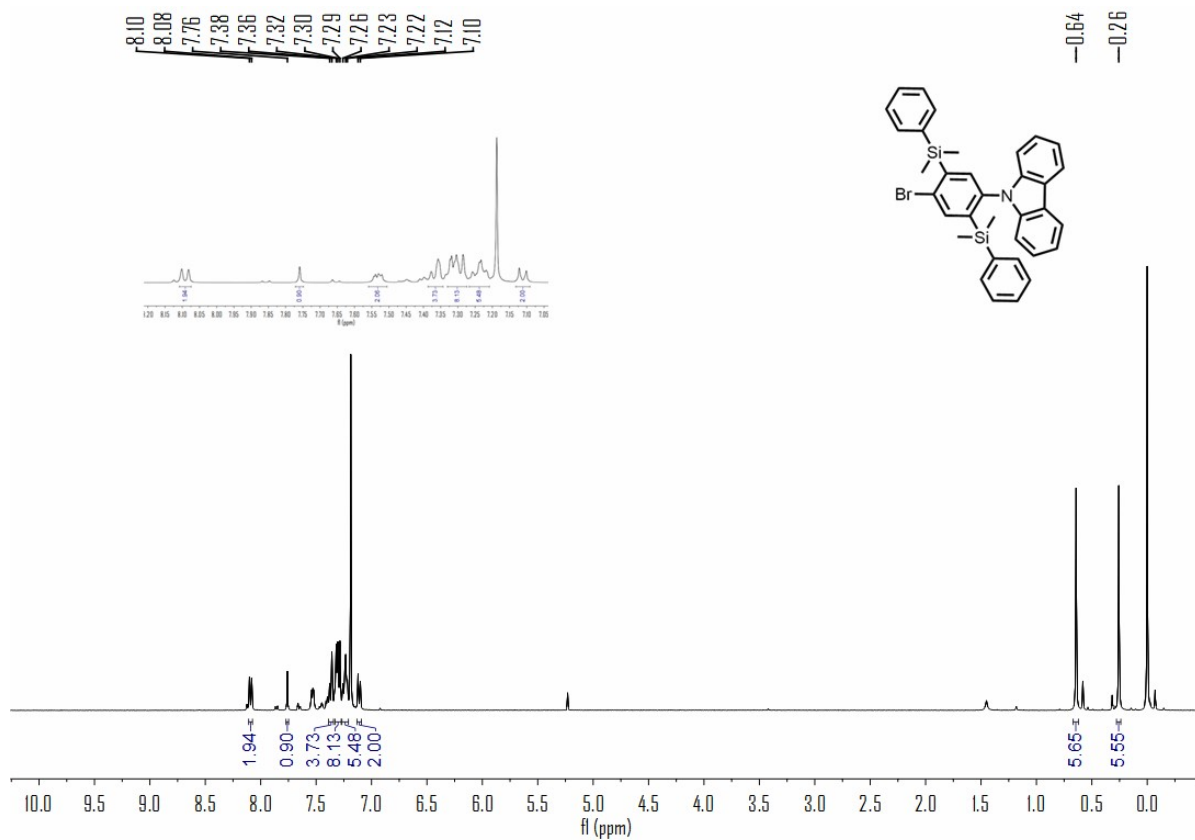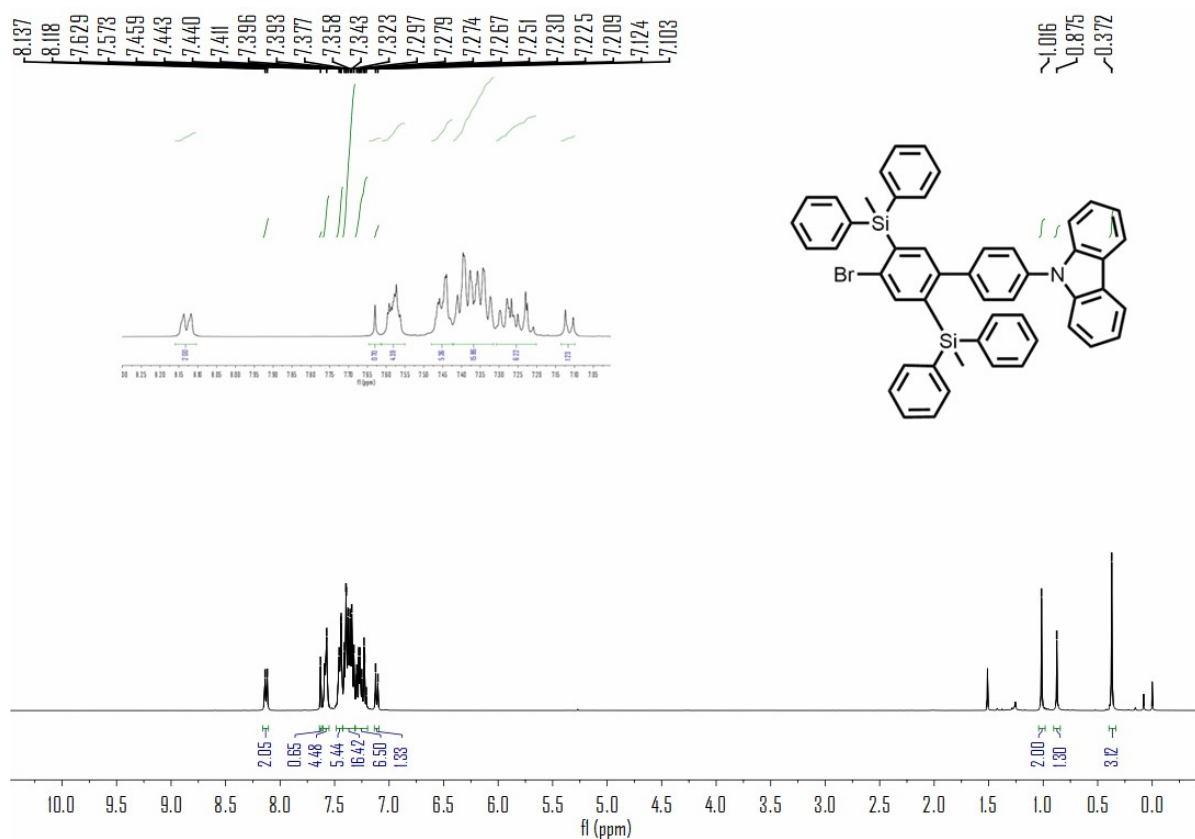

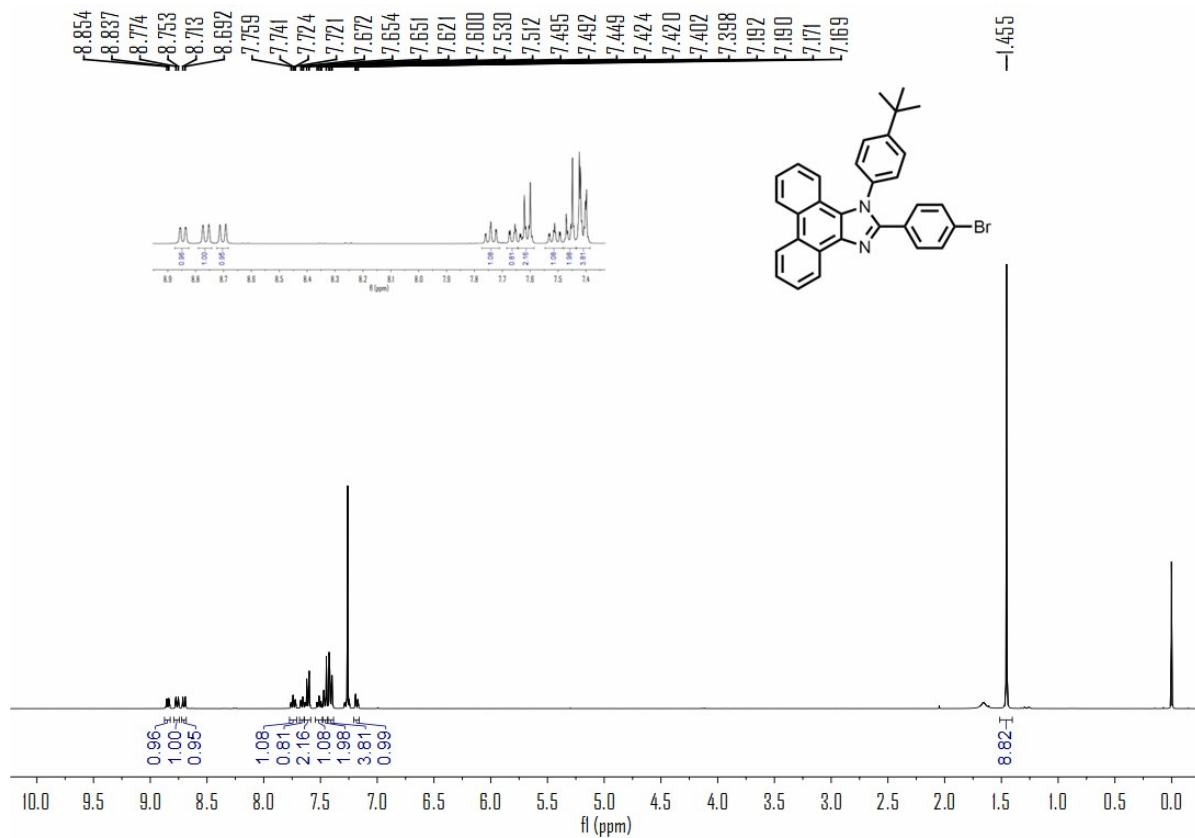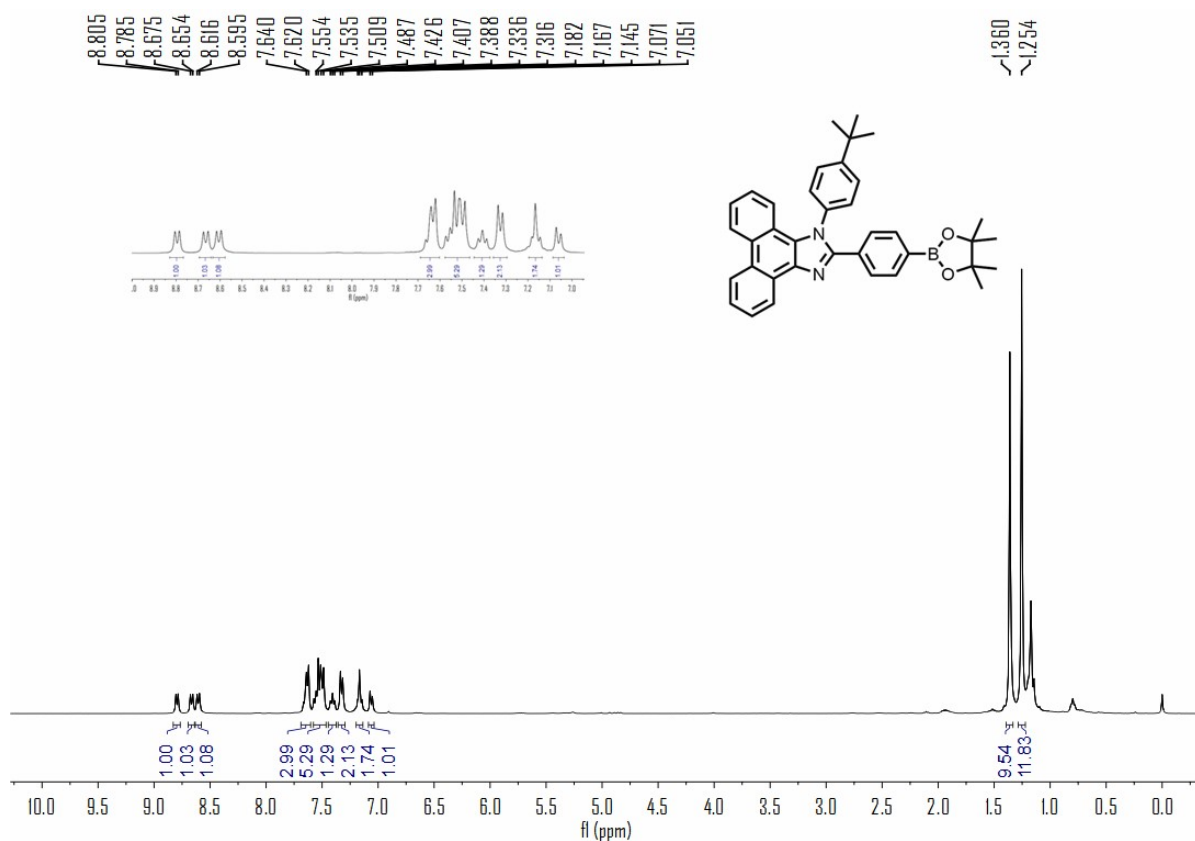



IV.  $^{13}\text{C}$  NMR of C2MPI and C2PPI in  $\text{CDCl}_3$  or  $\text{CD}_2\text{Cl}_2$ .

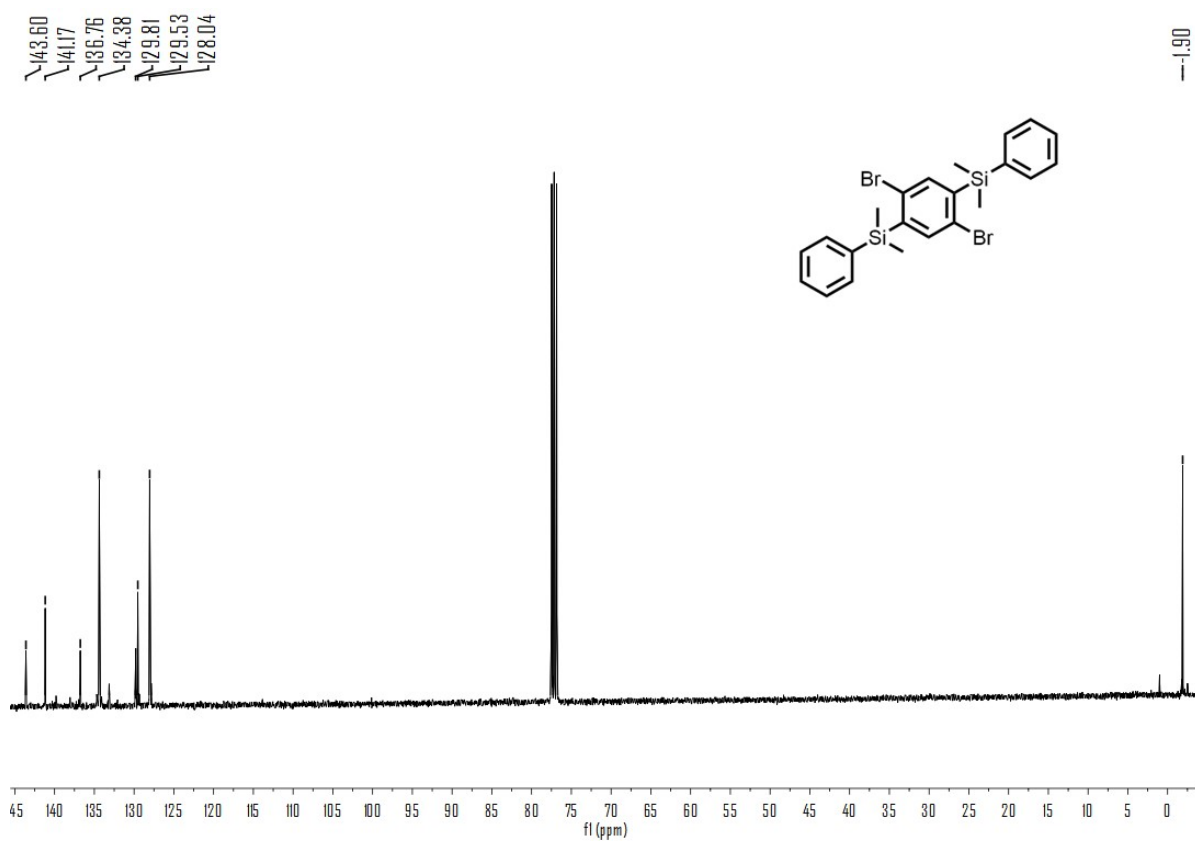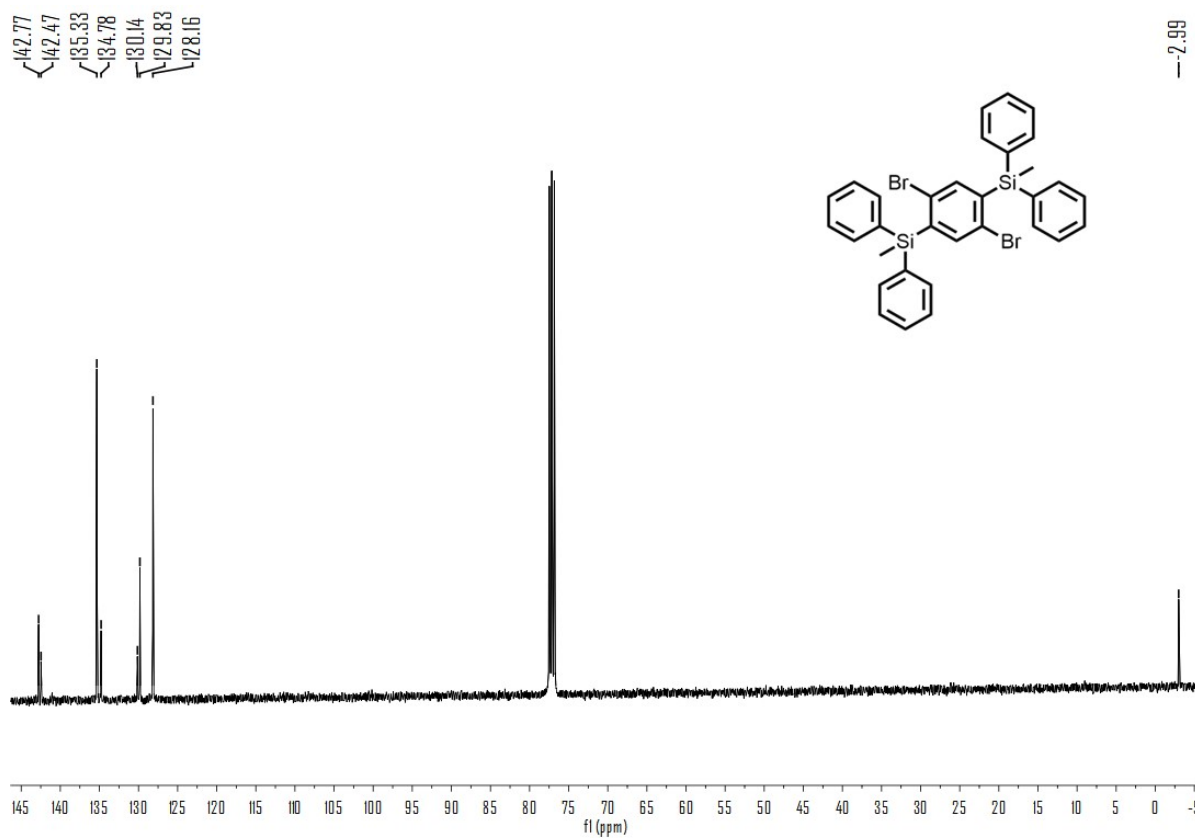

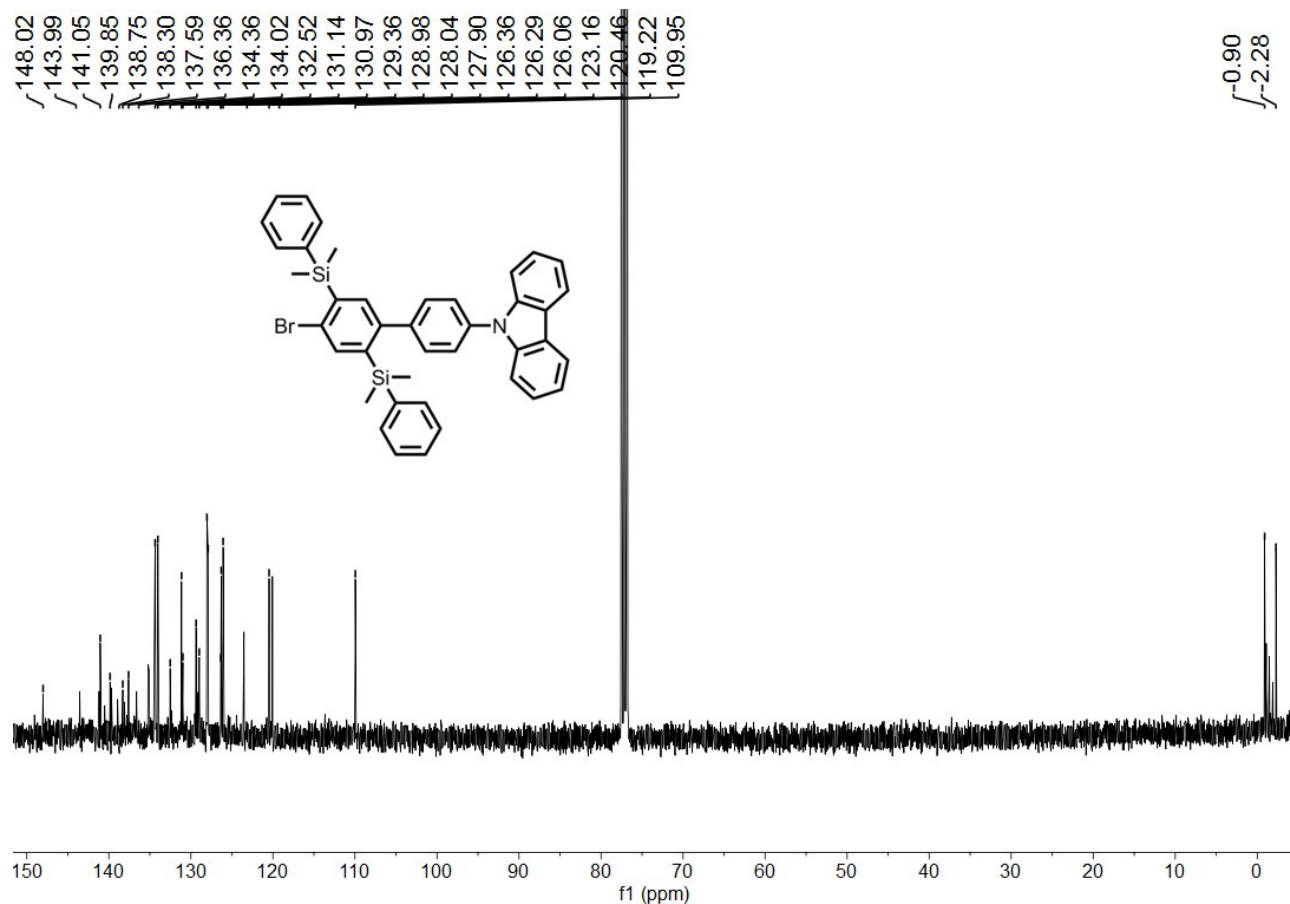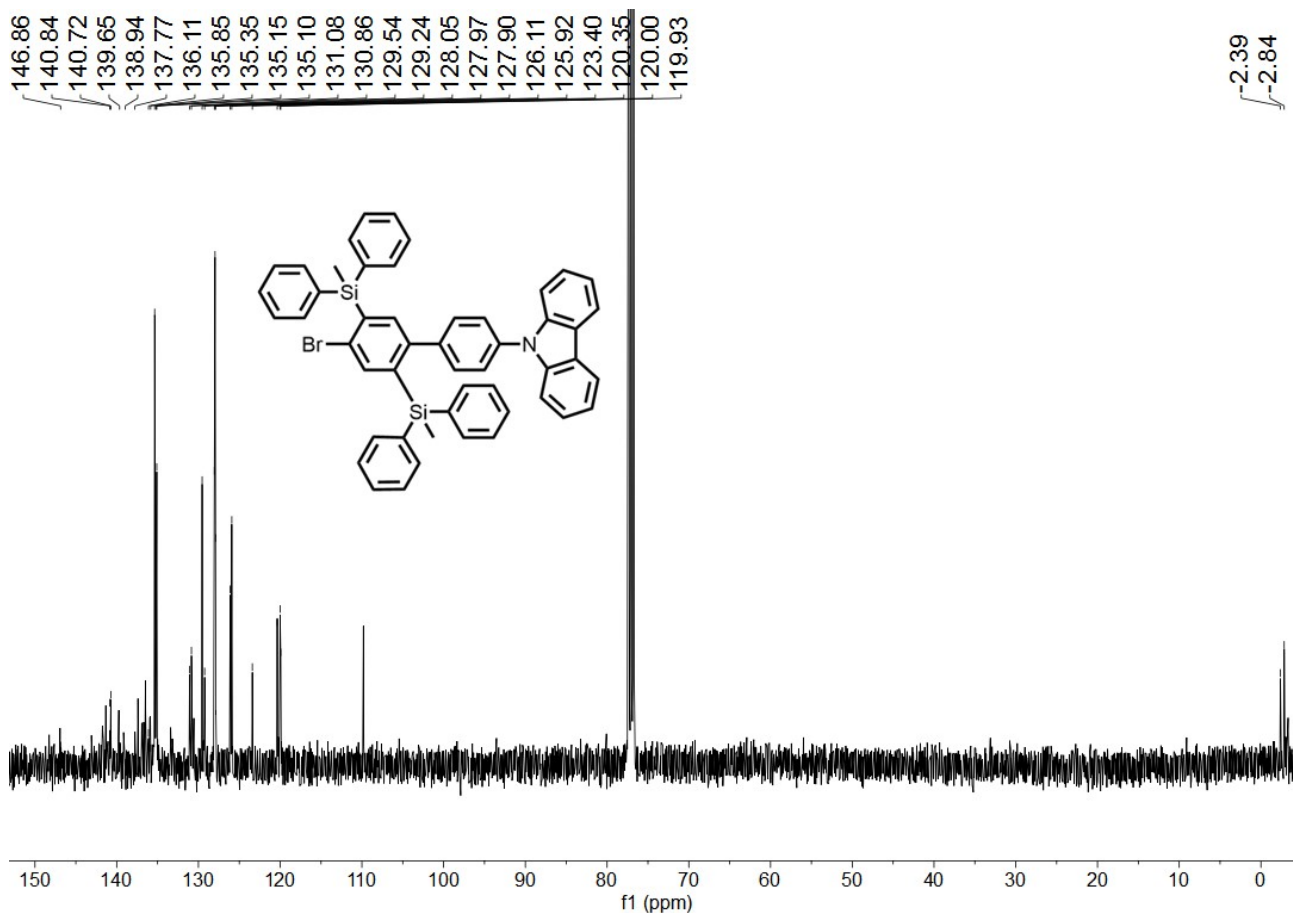

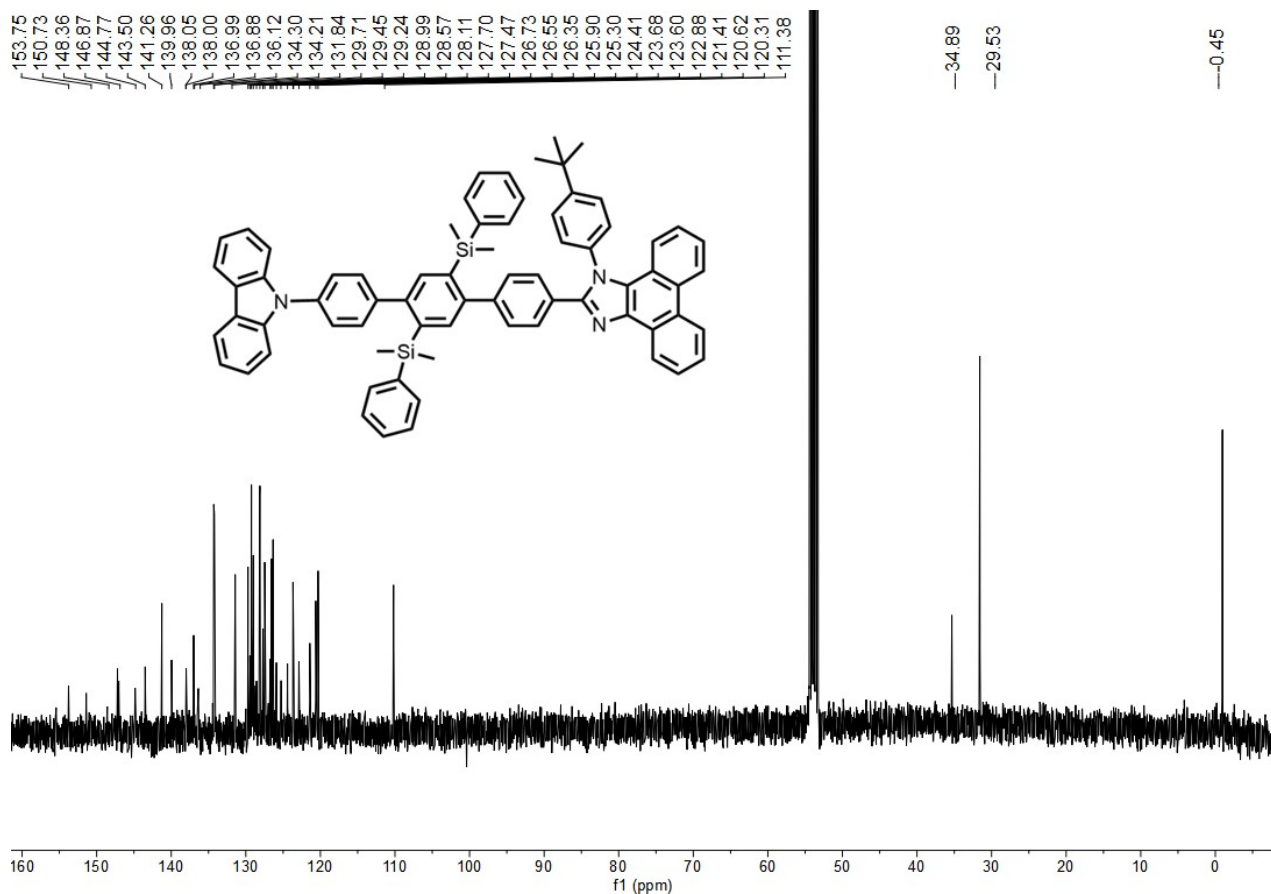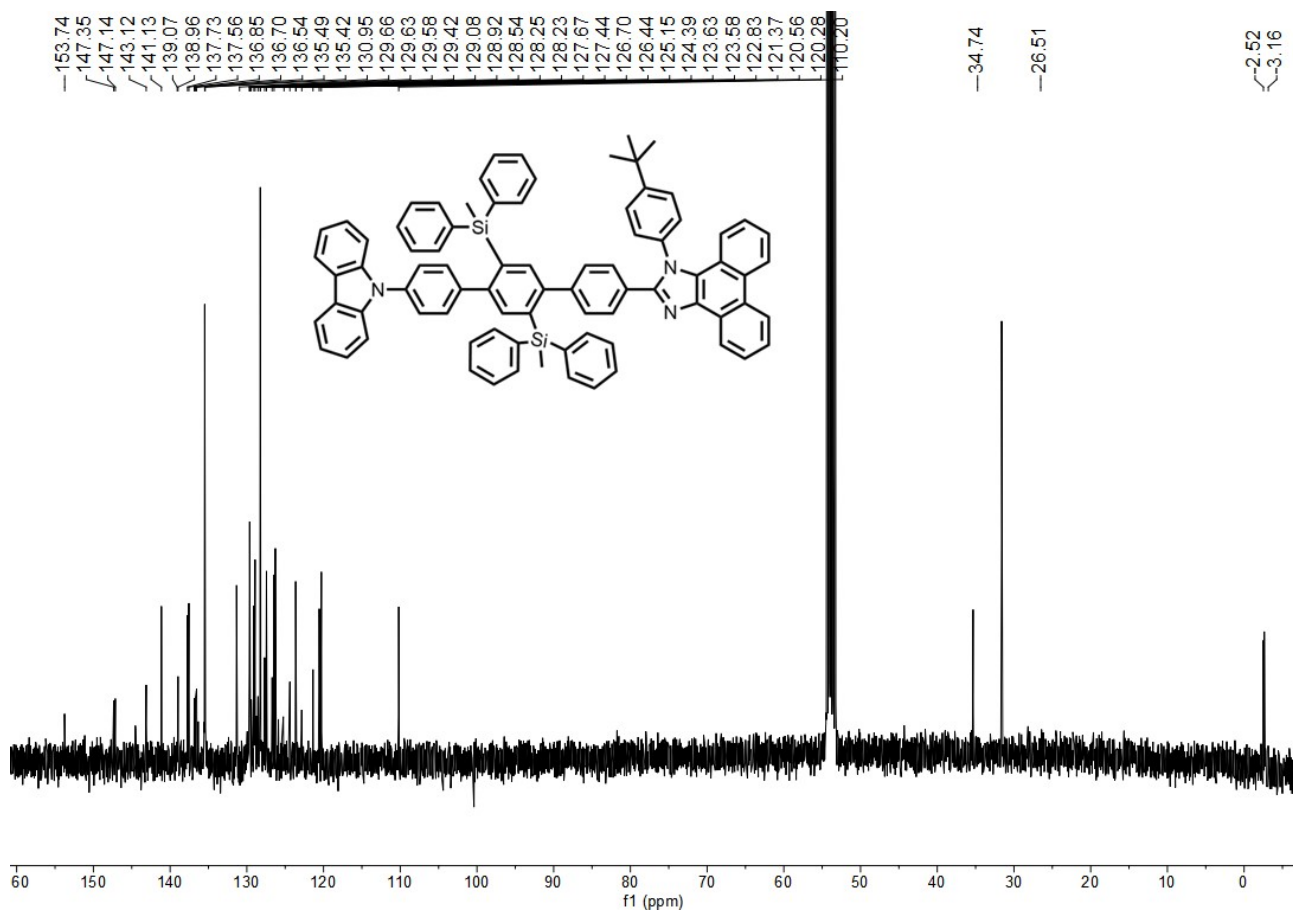



V. HR-MS of C2MPI and C2PPI.

Mass Spectrum SmartFormula Report

|                      |                                         |                   |                         |  |
|----------------------|-----------------------------------------|-------------------|-------------------------|--|
| <b>Analysis Info</b> |                                         | Acquisition Date  | 9/30/2021 2:34:01 PM    |  |
| Analysis Name        | D:\Data\Q-TOF-LUH-210928-LH-ZZT-1a_01.d | Operator          | BDAL@DE                 |  |
| Method               | ESI+100-800-201112.m                    | Instrument / Ser# | microTOF-Q II 228888.10 |  |
| Sample Name          |                                         |                   | 324                     |  |
| Comment              |                                         |                   |                         |  |

|                              |          |                       |           |                  |           |
|------------------------------|----------|-----------------------|-----------|------------------|-----------|
| <b>Acquisition Parameter</b> |          |                       |           |                  |           |
| Source Type                  | ESI      | Ion Polarity          | Positive  | Set Nebulizer    | 2.0 Bar   |
| Focus                        | Active   | Set Capillary         | 4500 V    | Set Dry Heater   | 180 °C    |
| Scan Begin                   | 500 m/z  | Set End Plate Offset  | -500 V    | Set Dry Gas      | 4.0 l/min |
| Scan End                     | 2000 m/z | Set Collision Cell RF | 180.0 Vpp | Set Divert Valve | Source    |

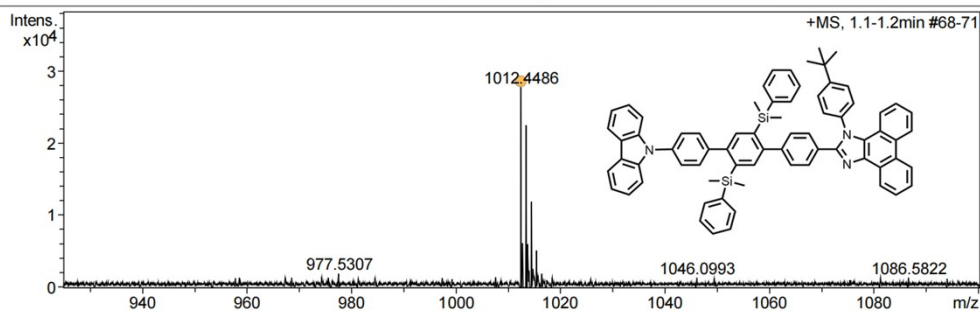

| Meas. m/z | # | Ion Formula | m/z       | err [ppm] | mSigma | # Sigma | Score  | rdb  | e <sup>-</sup> Conf | N-Rule |
|-----------|---|-------------|-----------|-----------|--------|---------|--------|------|---------------------|--------|
| 1012.4486 | 1 | C71H62N3Si2 | 1012.4477 | -0.9      | 35.8   | 1       | 100.00 | 44.5 | even                | ok     |

Mass Spectrum SmartFormula Report

|                      |                                         |                   |                         |  |
|----------------------|-----------------------------------------|-------------------|-------------------------|--|
| <b>Analysis Info</b> |                                         | Acquisition Date  | 9/30/2021 2:36:12 PM    |  |
| Analysis Name        | D:\Data\Q-TOF-LUH-210928-LH-ZZT-1b_01.d | Operator          | BDAL@DE                 |  |
| Method               | ESI+100-800-201112.m                    | Instrument / Ser# | microTOF-Q II 228888.10 |  |
| Sample Name          |                                         |                   | 324                     |  |
| Comment              |                                         |                   |                         |  |

|                              |          |                       |           |                  |           |
|------------------------------|----------|-----------------------|-----------|------------------|-----------|
| <b>Acquisition Parameter</b> |          |                       |           |                  |           |
| Source Type                  | ESI      | Ion Polarity          | Positive  | Set Nebulizer    | 2.0 Bar   |
| Focus                        | Active   | Set Capillary         | 4500 V    | Set Dry Heater   | 180 °C    |
| Scan Begin                   | 500 m/z  | Set End Plate Offset  | -500 V    | Set Dry Gas      | 4.0 l/min |
| Scan End                     | 2000 m/z | Set Collision Cell RF | 180.0 Vpp | Set Divert Valve | Source    |

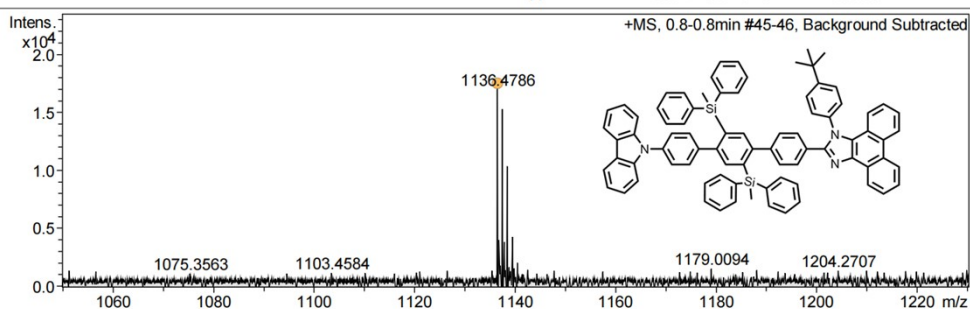

| Meas. m/z | # | Ion Formula | m/z       | err [ppm] | mSigma | # Sigma | Score  | rdb  | e <sup>-</sup> Conf | N-Rule |
|-----------|---|-------------|-----------|-----------|--------|---------|--------|------|---------------------|--------|
| 1136.4786 | 1 | C81H66N3Si2 | 1136.4790 | 0.3       | 60.1   | 1       | 100.00 | 52.5 | even                | ok     |
